# Supplementary material for: AXL Knock-Out in SNU475 Hepatocellular Carcinoma Cells Provides Evidence for Lethal Effect Associated with G2 Arrest and Polyploidization
Source: MDPI journal article supplement (doi:10.3390/ijms222413247), 2021-12-09
Supplement: s1 [file s1]

Archive with 1 entries (1 files):
- ijms-1477839-supplementary -update .pdf
