# Supplementary material for: AXL Knock-Out in SNU475 Hepatocellular Carcinoma Cells Provides Evidence for Lethal Effect Associated with G2 Arrest and Polyploidization
Source: MDPI journal article supplement (doi:10.3390/ijms222413247), 2021-12-09
Supplement: s1 [file s1 › ijms-1477839-supplementary -update .pdf]

### Supplementary Tables

**Table S1: List of primers and probes used in quantitative real-time PCR**

#### **Primers and probes used in quantitative real-time PCR**

|                       |                      |          |
|-----------------------|----------------------|----------|
| <b>AXL FL_forward</b> | CCTCCCAGTACCCCTGGA   | Probe 37 |
| <b>AXL FL_reverse</b> | AGGCAGGAGTTGAAGGTTCC | Probe 37 |
| <b>AXL V_forward</b>  | TGTGTGGCAGCCTACACTG  | Probe 1  |
| <b>AXL V_reverse</b>  | AAGGTCCTTCACTGGGCG   | Probe 1  |
| <b>GAPDH_forward</b>  | CTCTGCTCCTCCTGTTCGAC | Probe 60 |
| <b>GAPDH_reverse</b>  | AATCCGTTGACTCCGACCTT | Probe 60 |

**Table S2: List of primers of sgRNAs used in cloning**

#### **Sequences of sgRNAs**

|                  |                           |
|------------------|---------------------------|
| <b>hAxl-45F</b>  | CACCgGTGCTTGGCGCTGTGCGGCT |
| <b>hAxl-45R</b>  | AAACAGCCGCACAGCGCCAAGCACc |
| <b>hAxl-185F</b> | CACCgGAGAGCCCCCGAGGTACAT  |
| <b>hAxl-185R</b> | AAACATGTACCTCGGGGGGCTCTCc |
| <b>Ren-208F</b>  | CACCgGTAGCGCGGTGTATTATACC |
| <b>Ren-208R</b>  | AAACGGTATAATACACCGCGCTACc |

## Supplementary Figures:

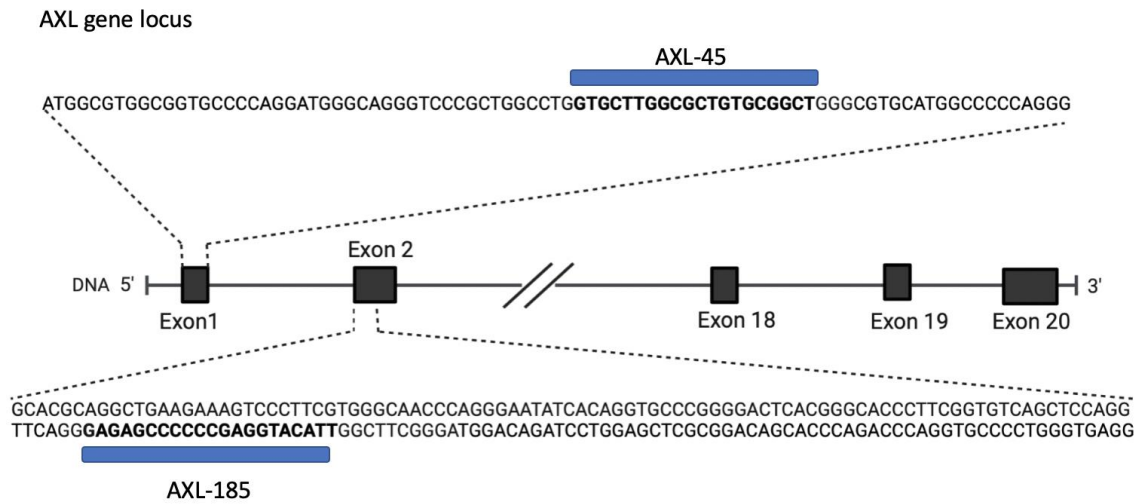

**Fig S1:** The schematic representation of the AXL gene target sequences for gRNAs used in CRISPR-Cas9-mediated gene knockout studies. AXL gene locus consisting of 20 exons (black) is shown in 5' to 3' orientation. The locations of gRNAs targeting the AXL gene locus are highlighted.

**A**

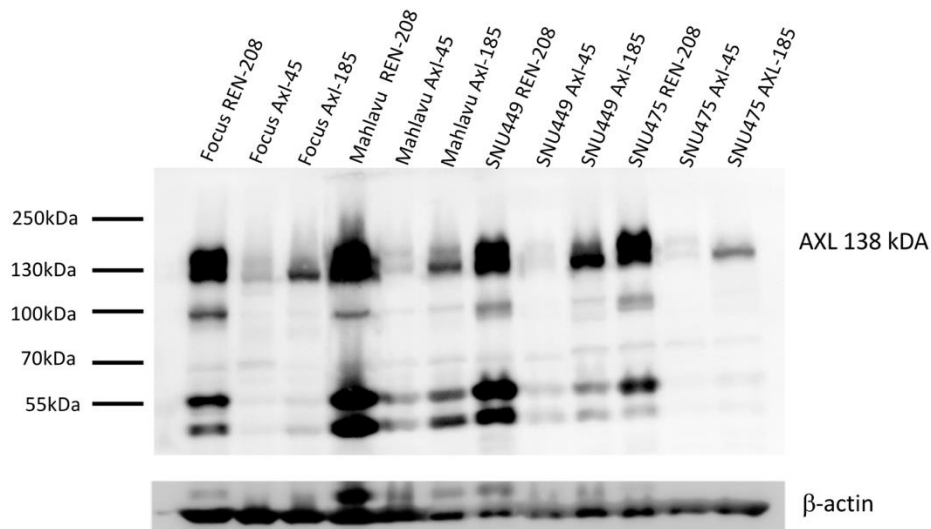

B

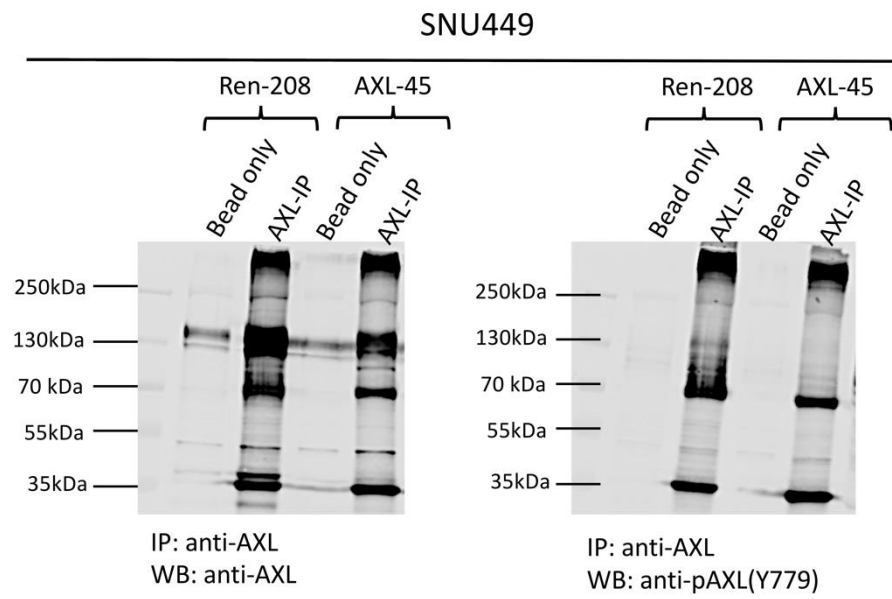

Figure S2: AXL expression in CRISPR-Cas9-mediated knock-out cells. A. AXL gene was targeted in 4 different HCC cell lines Focus, Mahlavu, SNU449 and SNU475 using gRNAs REN-208, AXL-45 and AXL-185. B. Anti-AXL blot and anti-pAXL(Y779) blot of anti AXL immunoprecipitated SNU449 cells targeted by Ren-208 and AXL-45.

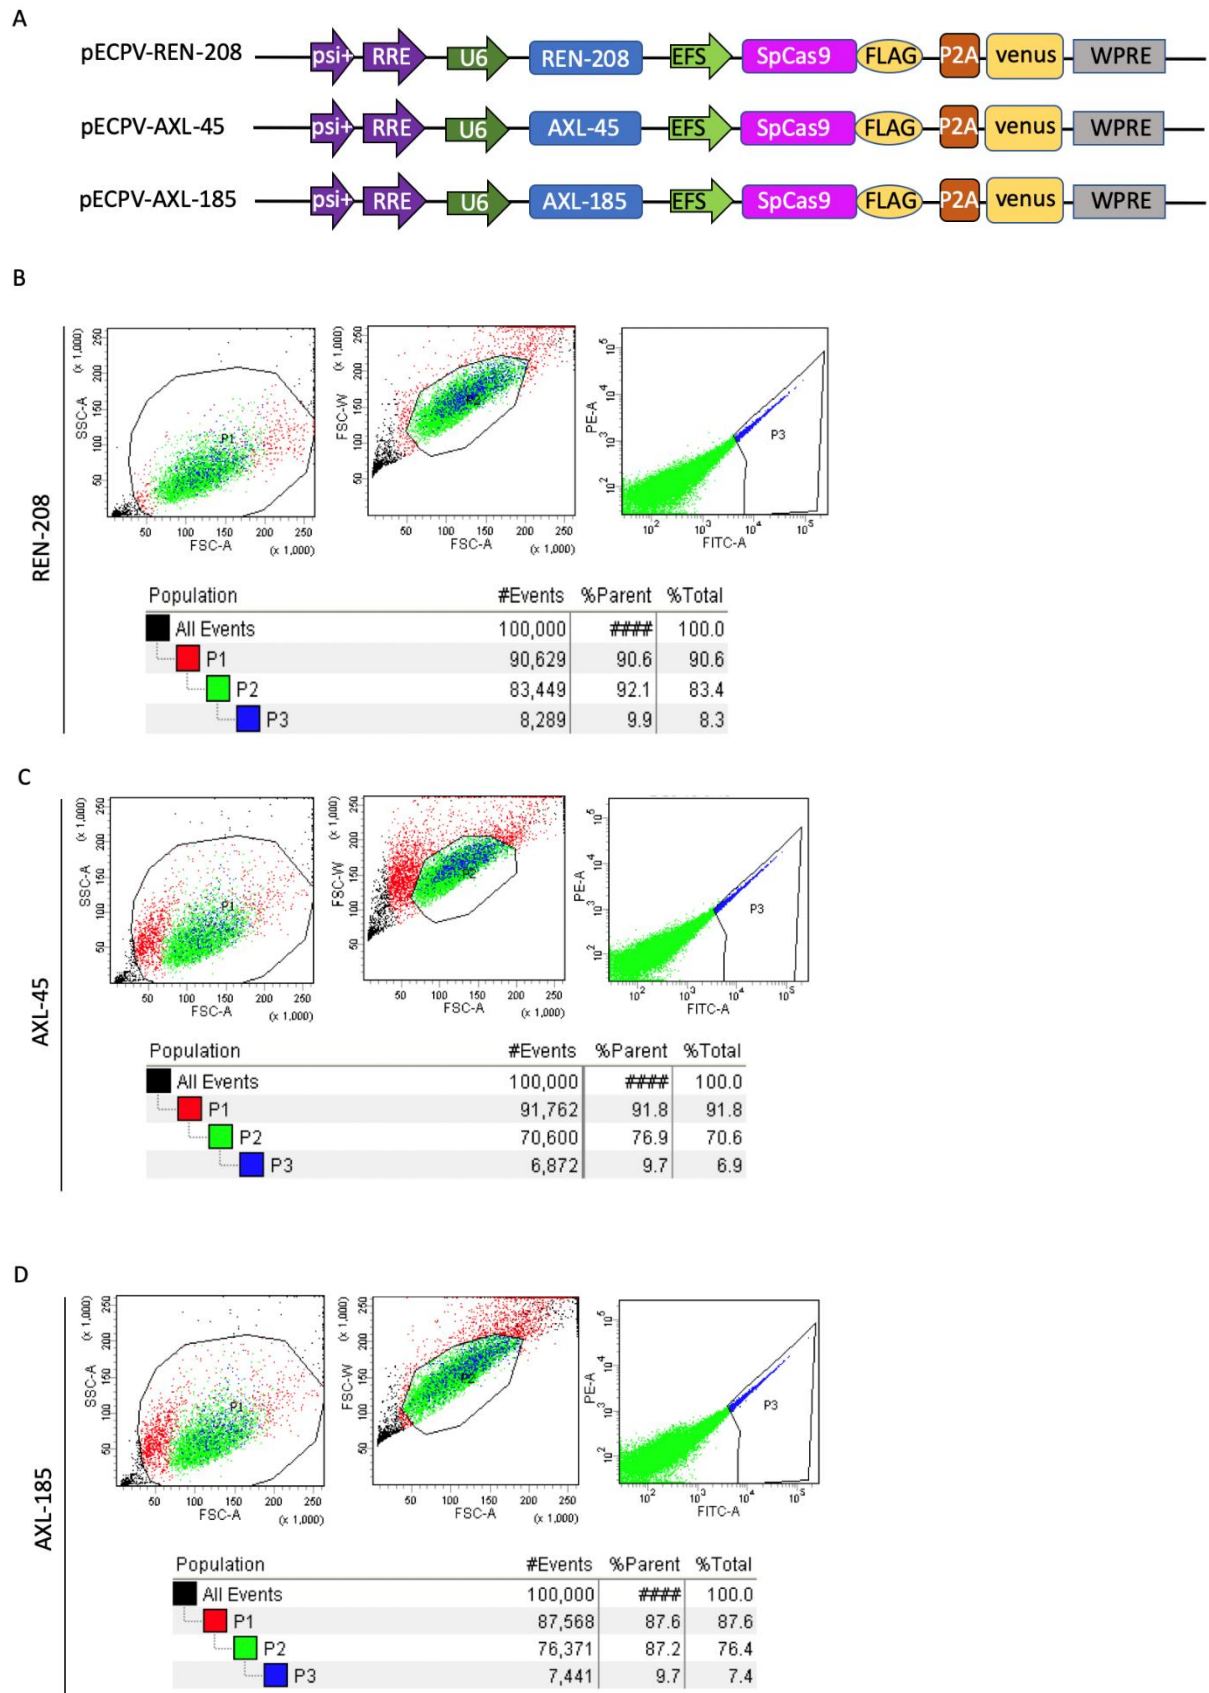

**Fig S3:** The schematic representation of vector maps carrying Renilla and AXL-specific gRNAs. (A) Backbone plasmid harbors psi+, RRE virus packaging elements; U6promoter and

gRNA expression cassette; EFS promoter and, SpCas9 (streptococcus pyogenes Cas9) coding sequence; P2A self-cleaving peptide, YFP (yellow fluorescent protein ) variant Venus gene expression cassette; and WPRE post-transcriptional regulatory element. (B,C,D) Cell sorting gates for Venus-positive cells are depicted for REN-208 (B), AXL-45 (C), and AXL-185 (D)

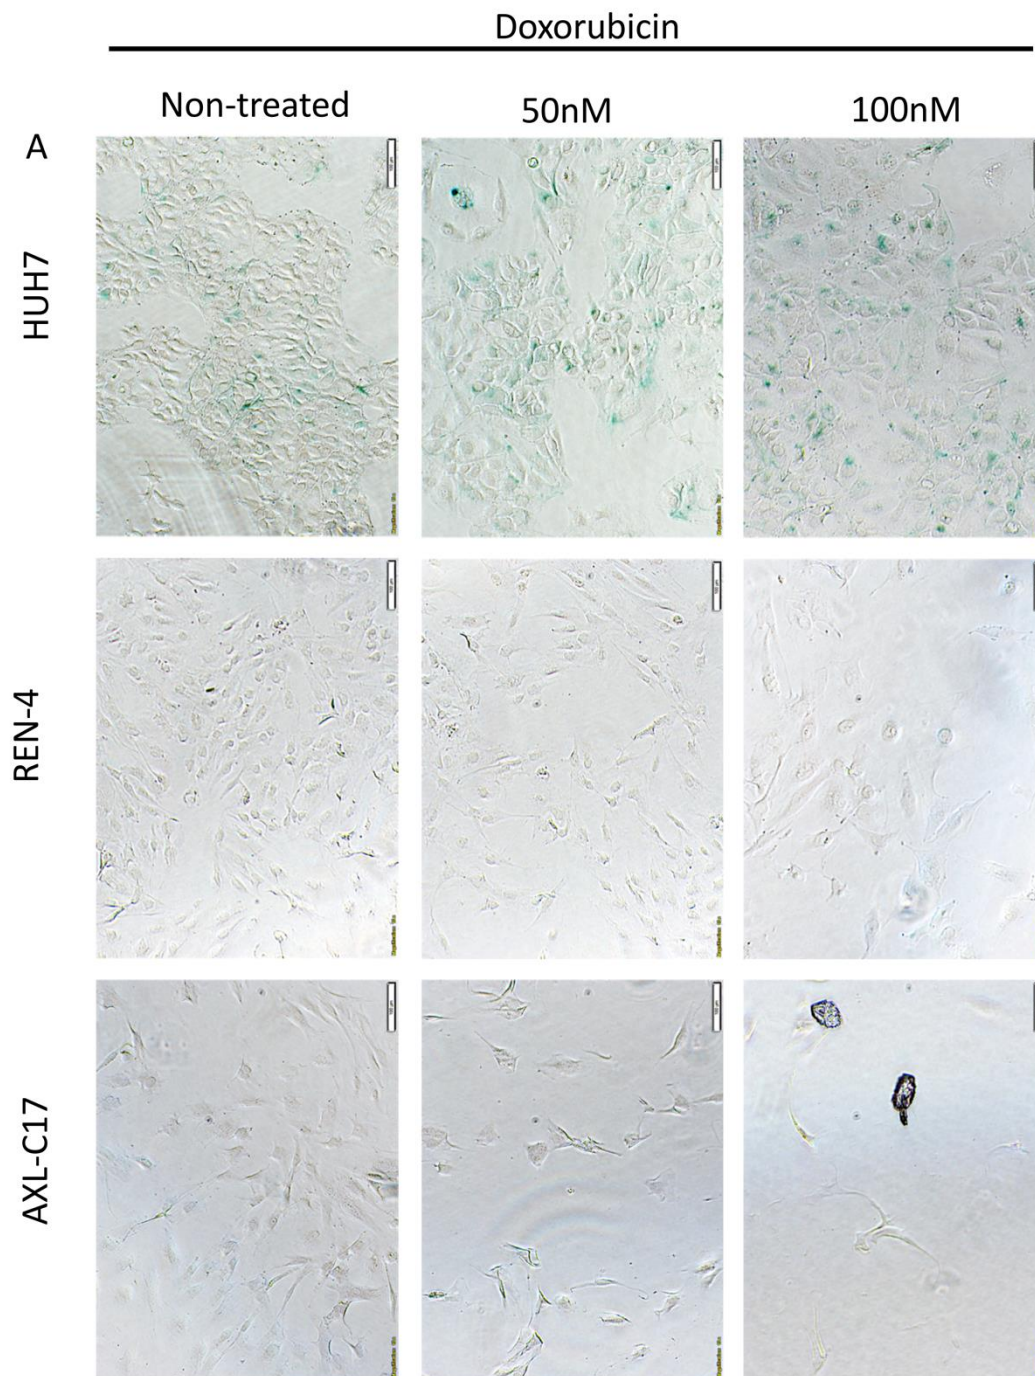

Figure S4: SA- $\beta$ -Galactosidase Assay of AXL-knockout cells. Huh7 parental was used as a positive control. Representative images non-treated, and 50 and 100 nM of Doxorubicin treated cells are shown.

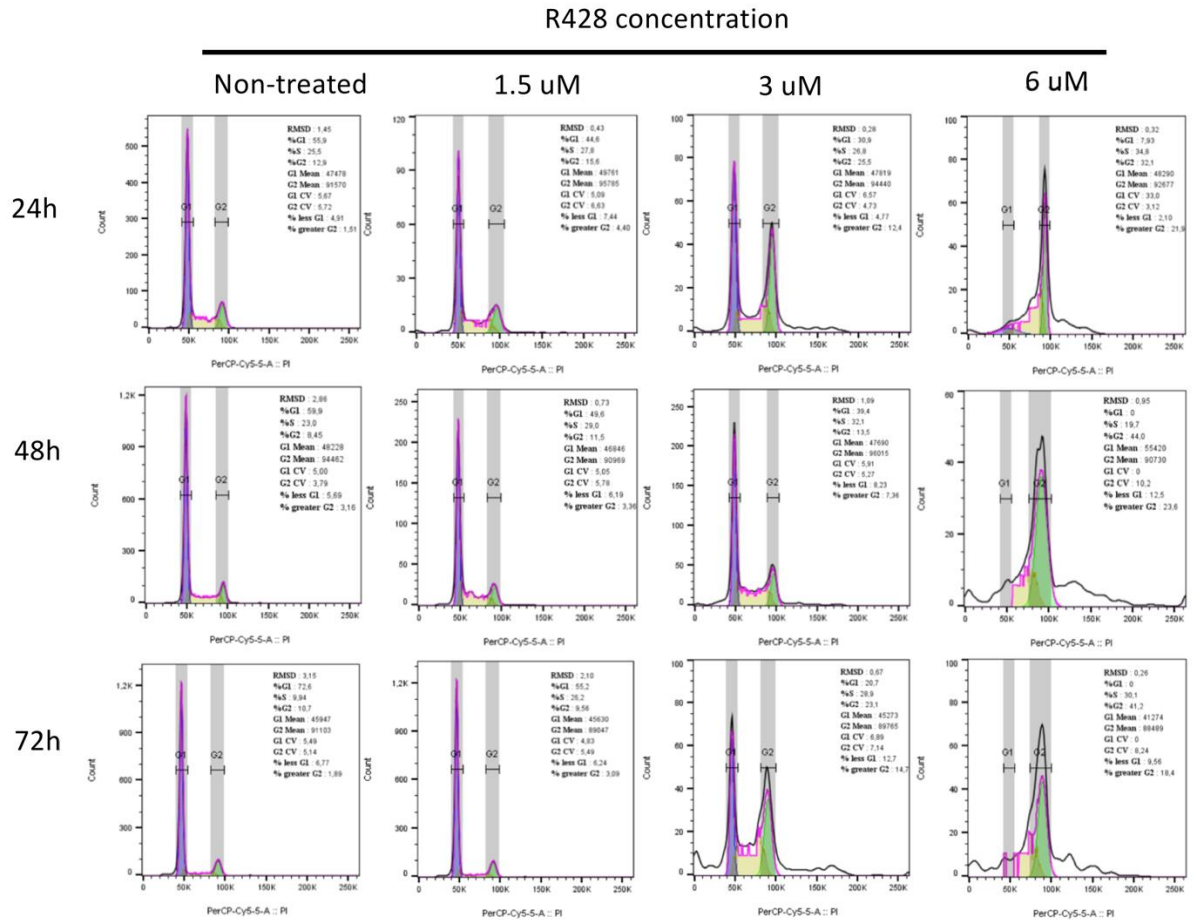

Figure S5: Cell cycle analysis of the parental SNU475 cell line treated with 0,1.5, 3 and 6 $\mu$ M R428 for 24, 48 and 72 hours.

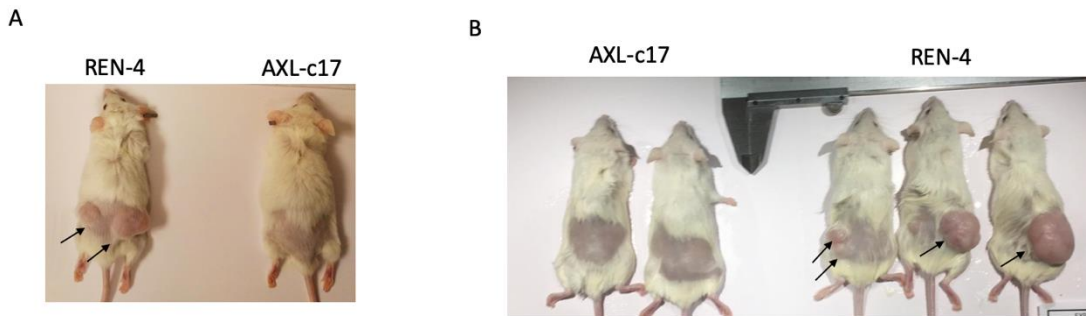

Figure S6: Tumorigenicity of SNU475-derived REN-4 and AXL-c17 clones. (A,B) Examples of subcutaneous tumors formed by REN-4 as compared to the absence of tumors by AXL knock-out AXL-c17 cells in immunodeficient NOD-SCID $\gamma$  mice. Tumors of REN-4 cells were observed as a result of the two-sided injection, 1 $\times$ 10<sup>6</sup> cells on each side (A) and the one-sided injection of 2 $\times$ 10<sup>5</sup> cells (B). Animals were shaved at cell injection sites to better visualize tumor formation.

## **Supplementary Methods:**

### **SA- $\beta$ -Galactosidase Assay**

SA- $\beta$ -Galactosidase Assay was performed as previously described. Briefly, non-treated controls and cells treated with 50 and 100 nM doxorubicin (Sigma, D15151) for 72 hours were fixed in 3% formaldehyde at room temperature. Cells were washed twice with 1xPBS. X-gal staining solution (40mM citric acid, 140 mM  $\text{Na}_2\text{HPO}_4$ , 60 mM  $\text{NaH}_2\text{PO}_4$ , 5 mM potassium ferricyanide and 5 mM potassium ferrocyanide 150 mM NaCl, 2 mM  $\text{MgCl}_2$ , and 1mg/ml X-gal at pH=6.0) was added. Cells were incubated at 37°C for 16 hours. 10x Bright Field images were obtained using Olympus IX71.
